# Supplementary material for: Relationship between Antioxidant Activity and Ligand Basicity in the Dipicolinate Series of Oxovanadium(IV) and Dioxovanadium(V) Complexes
Source: MDPI journal article supplement (doi:10.3390/ijms22189886), 2021-09-13
Supplement: s1 [file s1]

## Supplementary Materials

### Relationship between antioxidant activity and ligand basicity in the dipicolinate series of oxovanadium(IV) and dioxovanadium(V) complexes

Joanna Drzeżdżon<sup>1</sup>, Marta Pawlak<sup>1</sup>, Natalia Matyka<sup>1</sup>, Artur Sikorski<sup>1</sup>,  
Barbara Gawdzik<sup>2,\*</sup> and Dagmara Jacewicz<sup>1</sup>

<sup>1</sup> Faculty of Chemistry, University of Gdańsk, Wita Stwosza 63, 80-308 Gdańsk, Poland;  
joanna.drzezdzon@ug.edu.pl (J.D.); marta.pawlak0812@gmail.com (M.P.); natmatyla@gmail.com (N.M.);  
artur.sikorski@ug.edu.pl (A.S.); dagmara.jacewicz@ug.edu.pl (D.J.);

<sup>2</sup> Institute of Chemistry, Jan Kochanowski University, Świętokrzyska 15 G, 25-406 Kielce, Poland;  
b.gawdzik@ujk.edu.pl

\* Correspondence: b.gawdzik@ujk.edu.pl; Tel.: +48 41 349 70 16

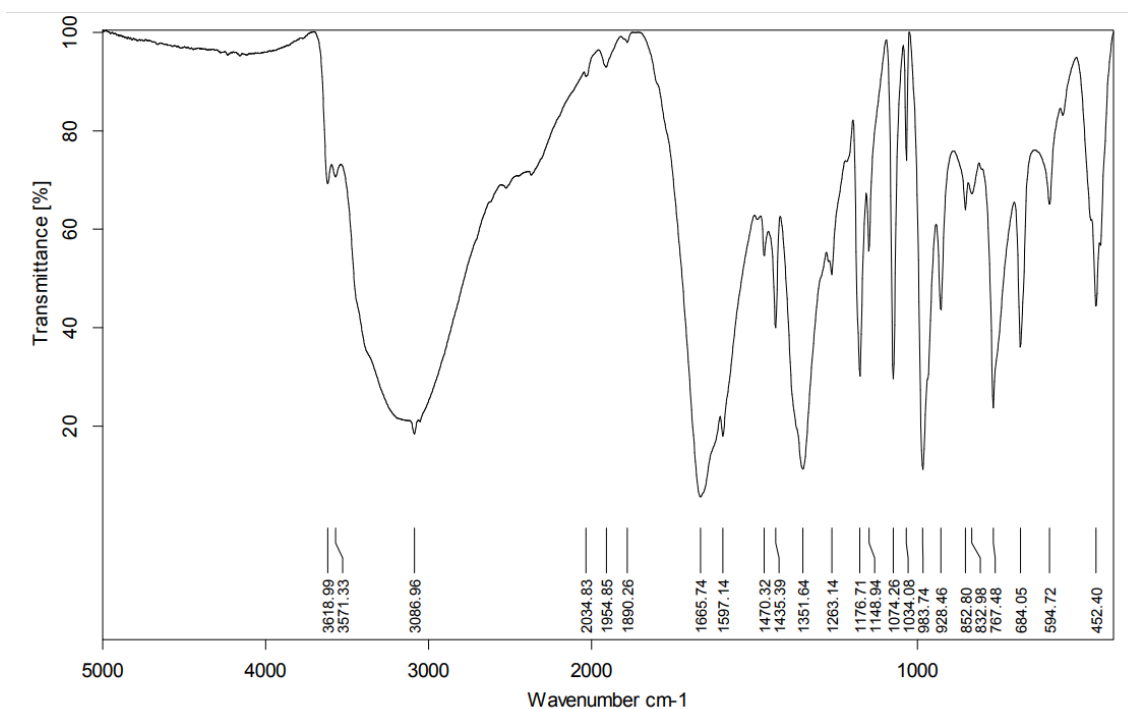

**Figure S1.** IR spectrum of  $[\text{VO}(\text{dipic})(\text{H}_2\text{O})_2] \cdot 2 \text{H}_2\text{O}$ .

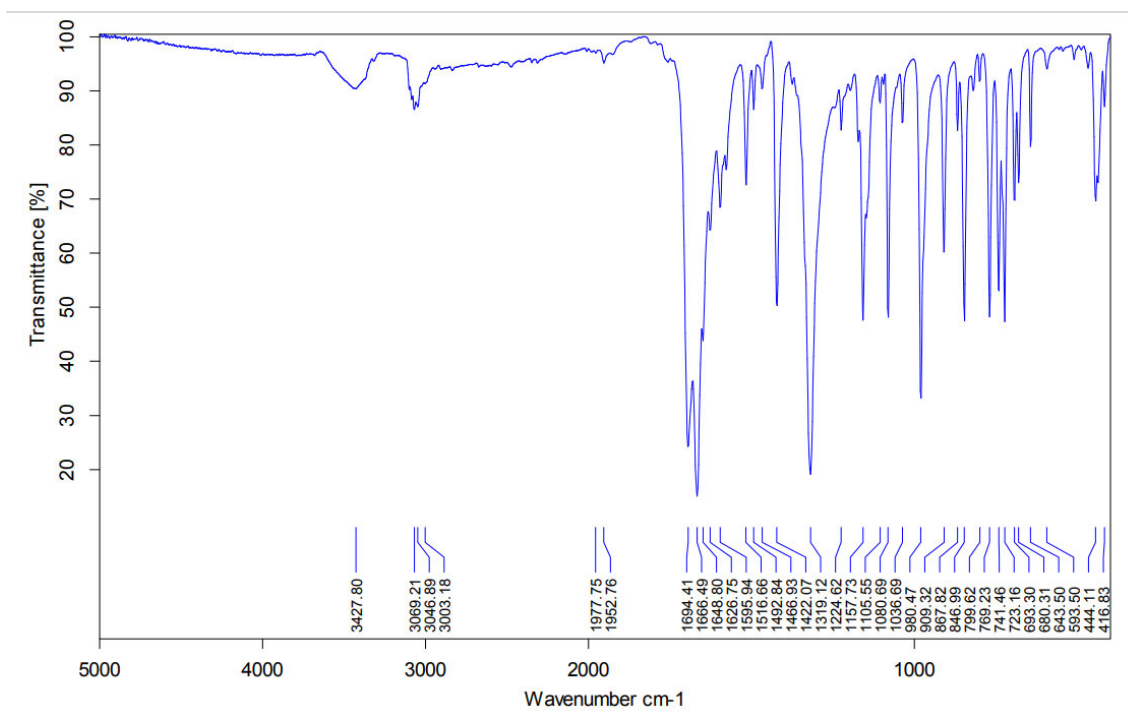

**Figure S2.** IR spectrum of  $[\text{VO}(\text{dipic})(\text{phen})] \cdot 3 \text{H}_2\text{O}$ .

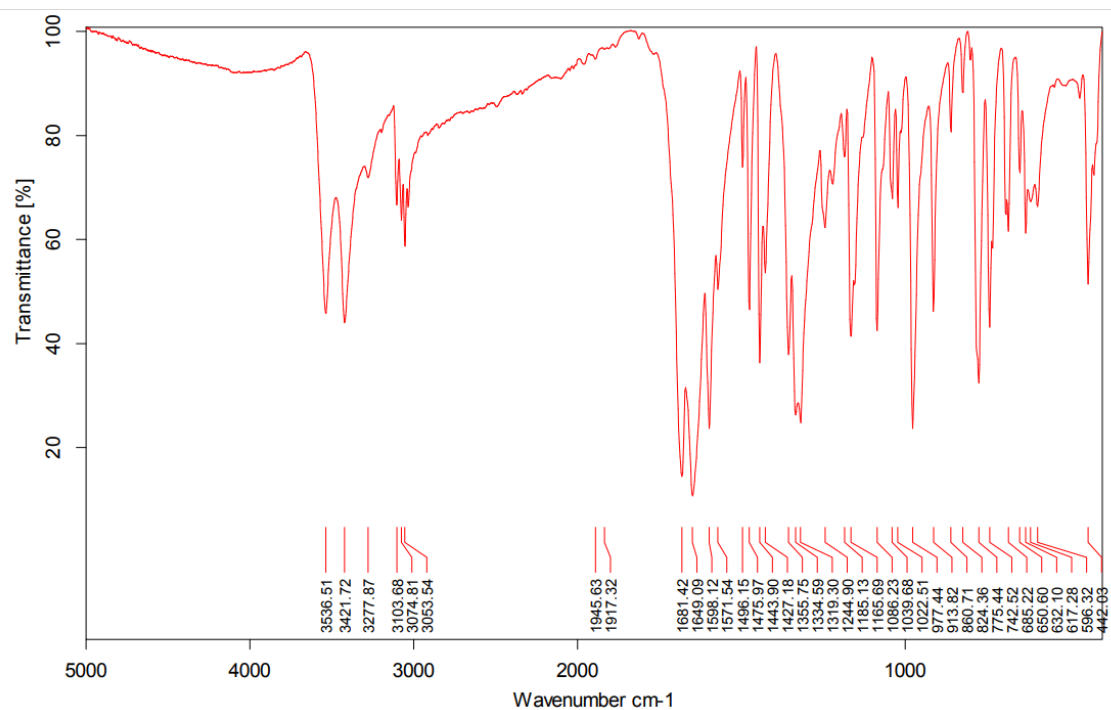

**Figure S3.** IR spectrum of [VO(dipic)(bipy)] · H<sub>2</sub>O.

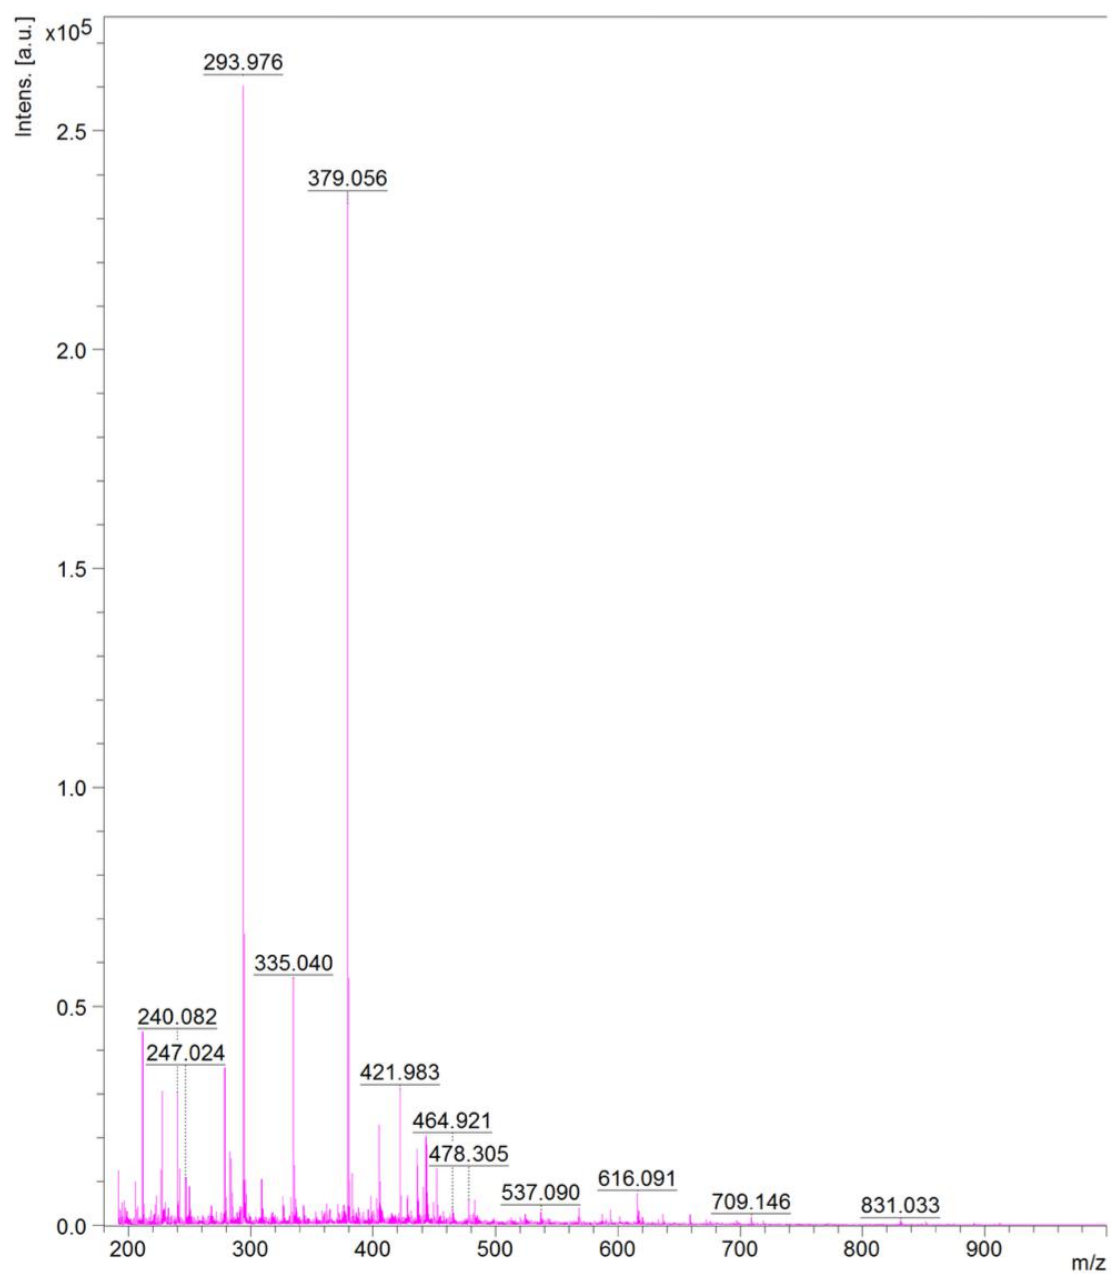

**Figure S4.** MALDI-TOF-MS spectrum of  $[\text{VO}(\text{dipic})(\text{H}_2\text{O})_2] \cdot 2 \text{H}_2\text{O}$  (CCA matrix).

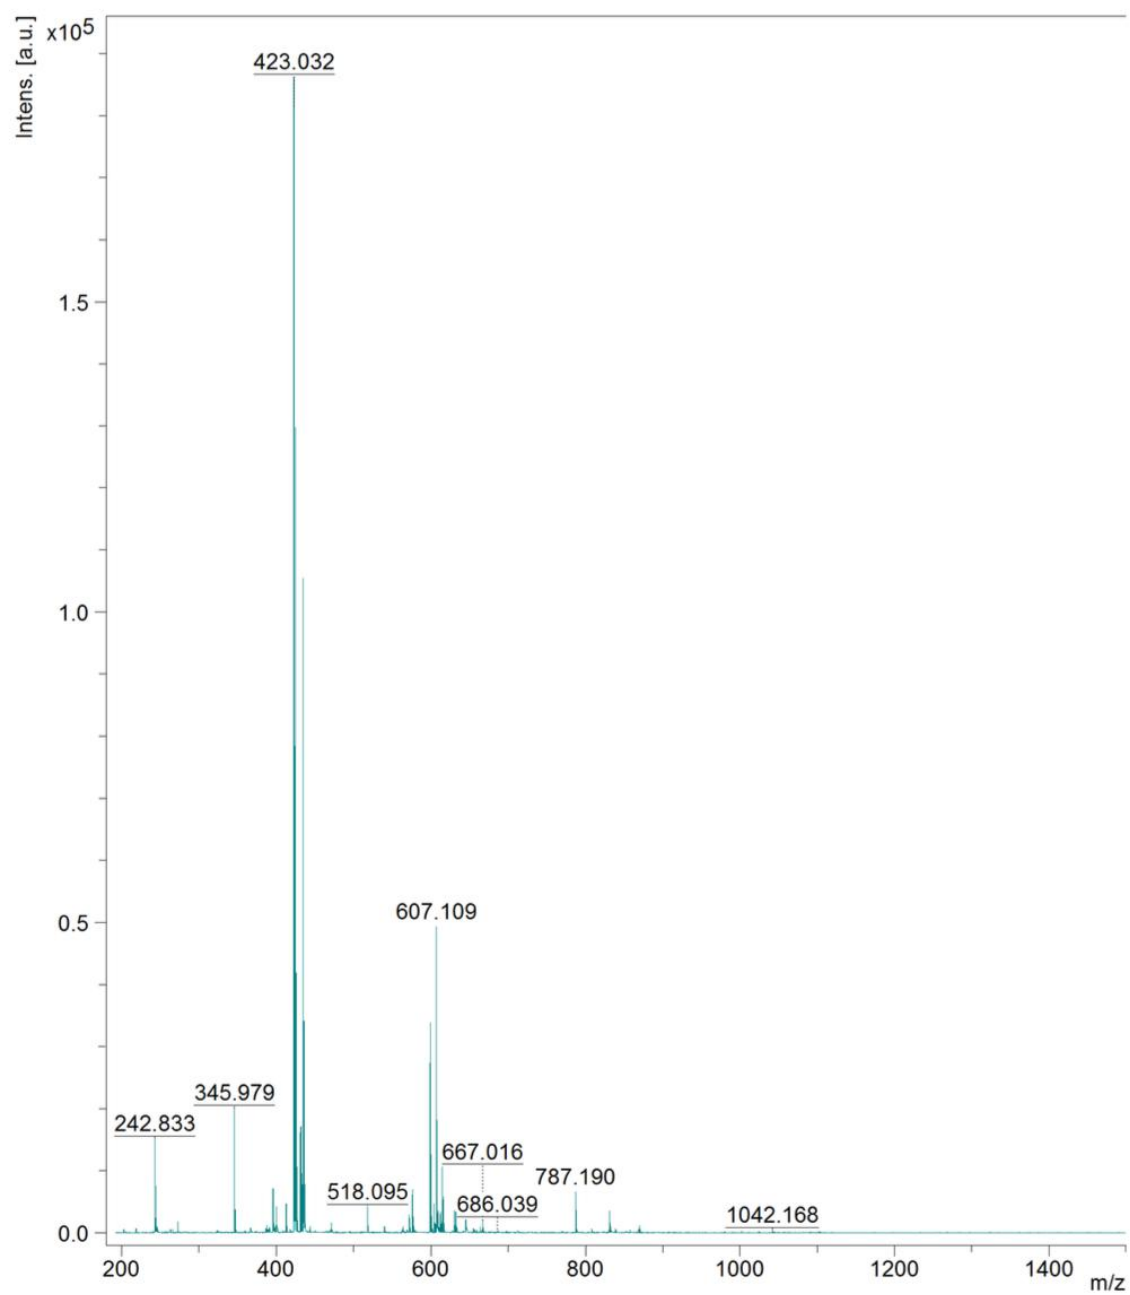

**Figure S5.** MALDI-TOF-MS spectrum of [VO(dipic)(phen)] · 3 H<sub>2</sub>O (CCA matrix).

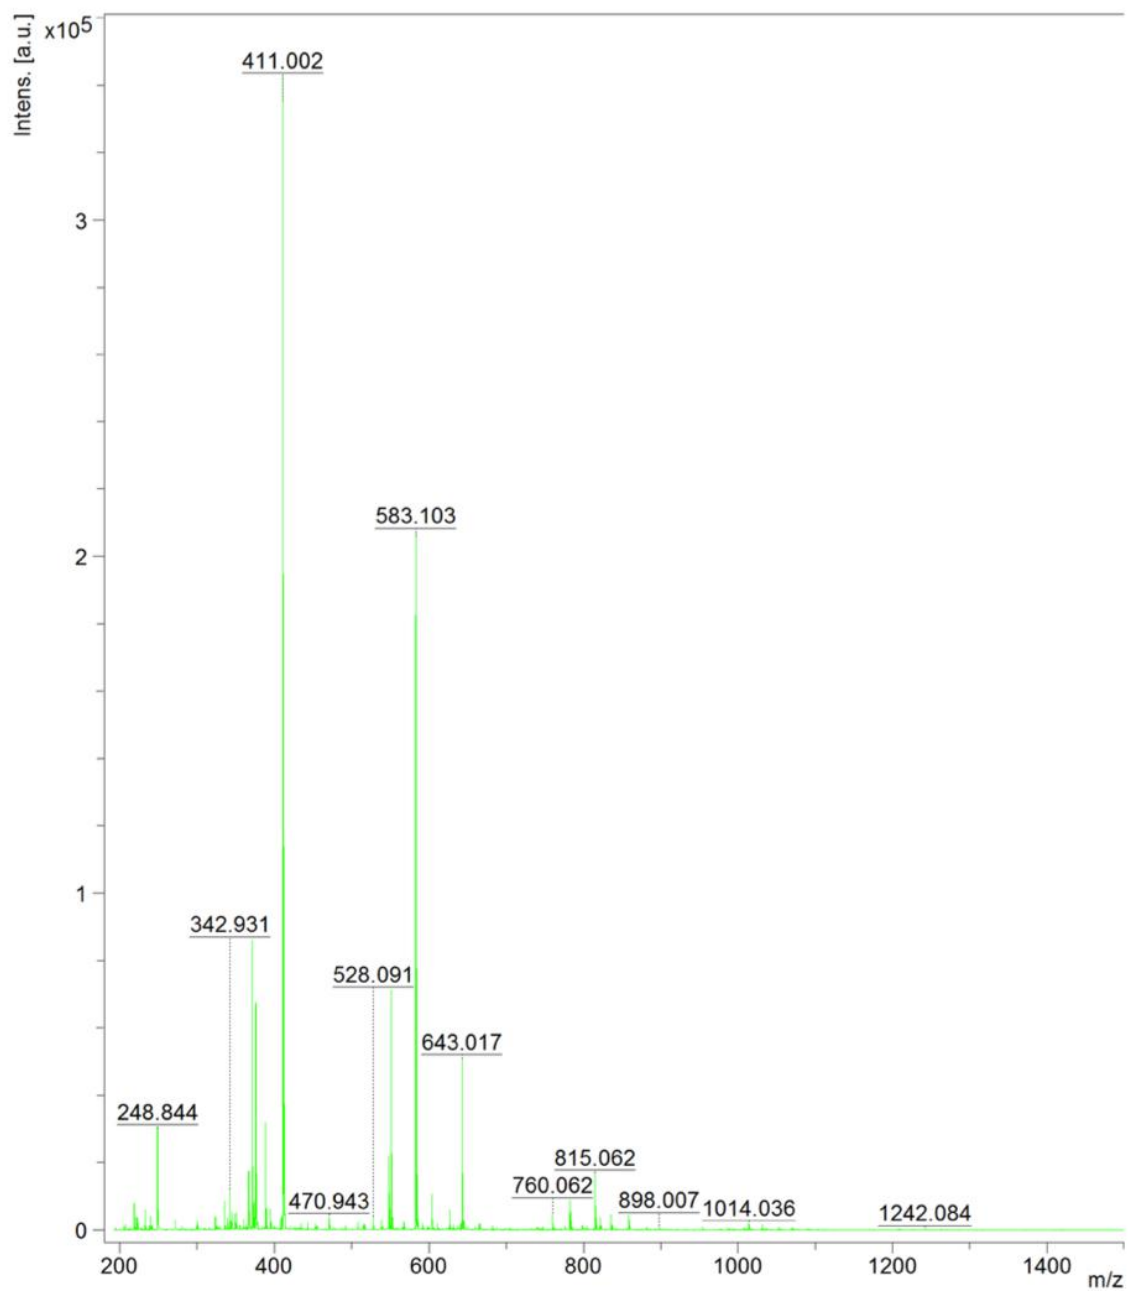

**Figure S6.** MALDI-TOF-MS spectrum of  $[\text{VO}(\text{dipic})(\text{bipy})] \cdot \text{H}_2\text{O}$  (CCA matrix).

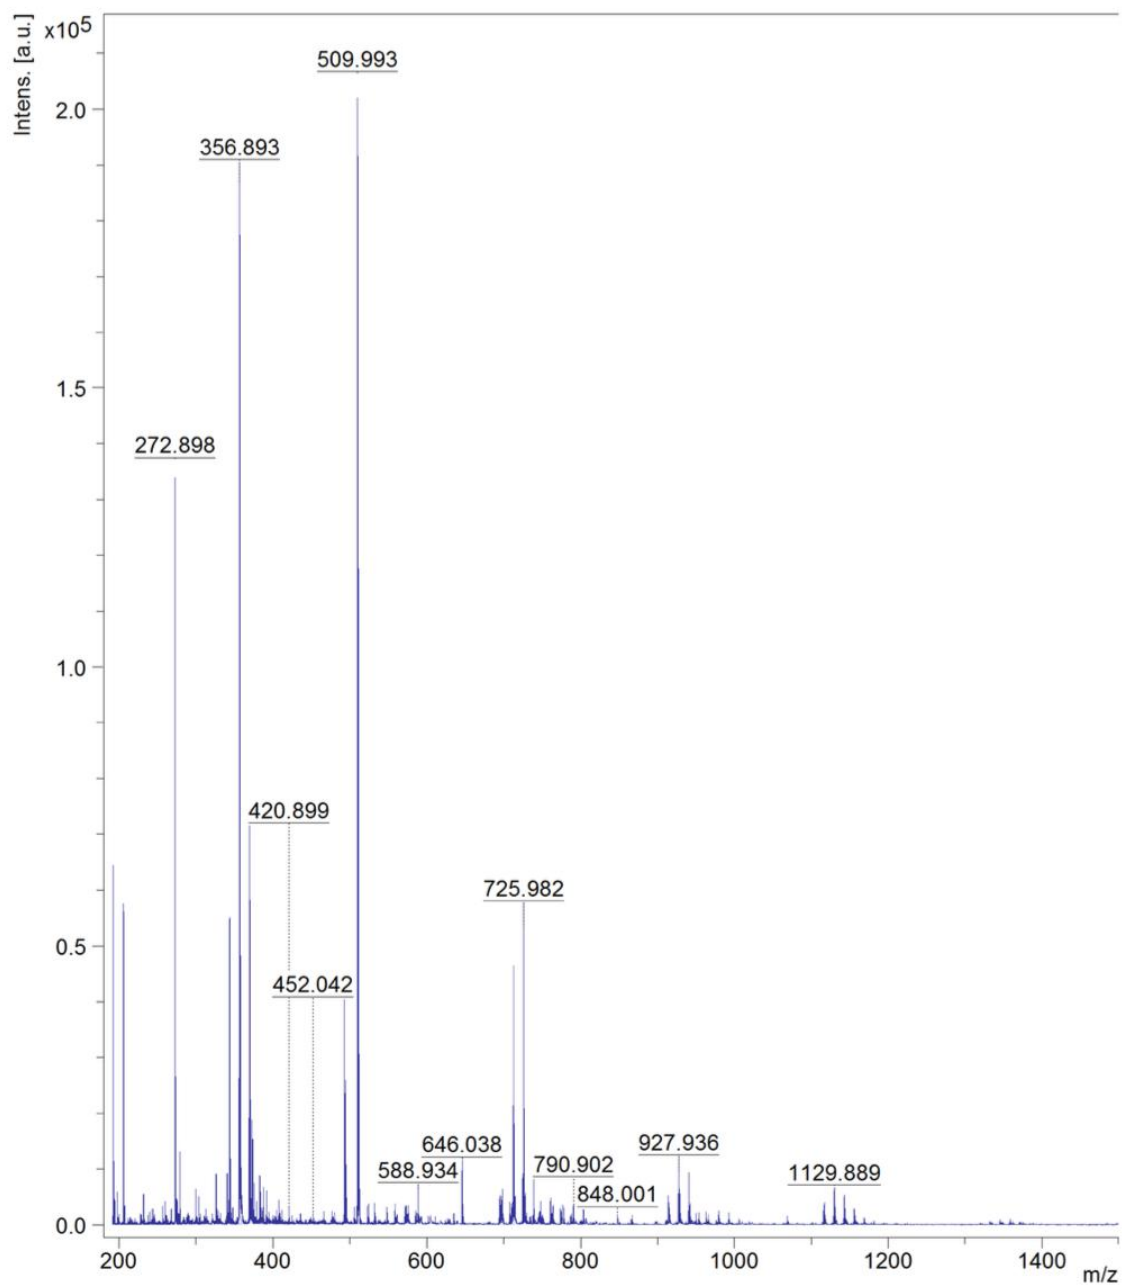

**Figure S7.** MALDI-TOF-MS spectrum of  $[\text{VO}(\text{dipic})(\text{H}_2\text{O})_2] \cdot 2 \text{H}_2\text{O}$  (DHB matrix).

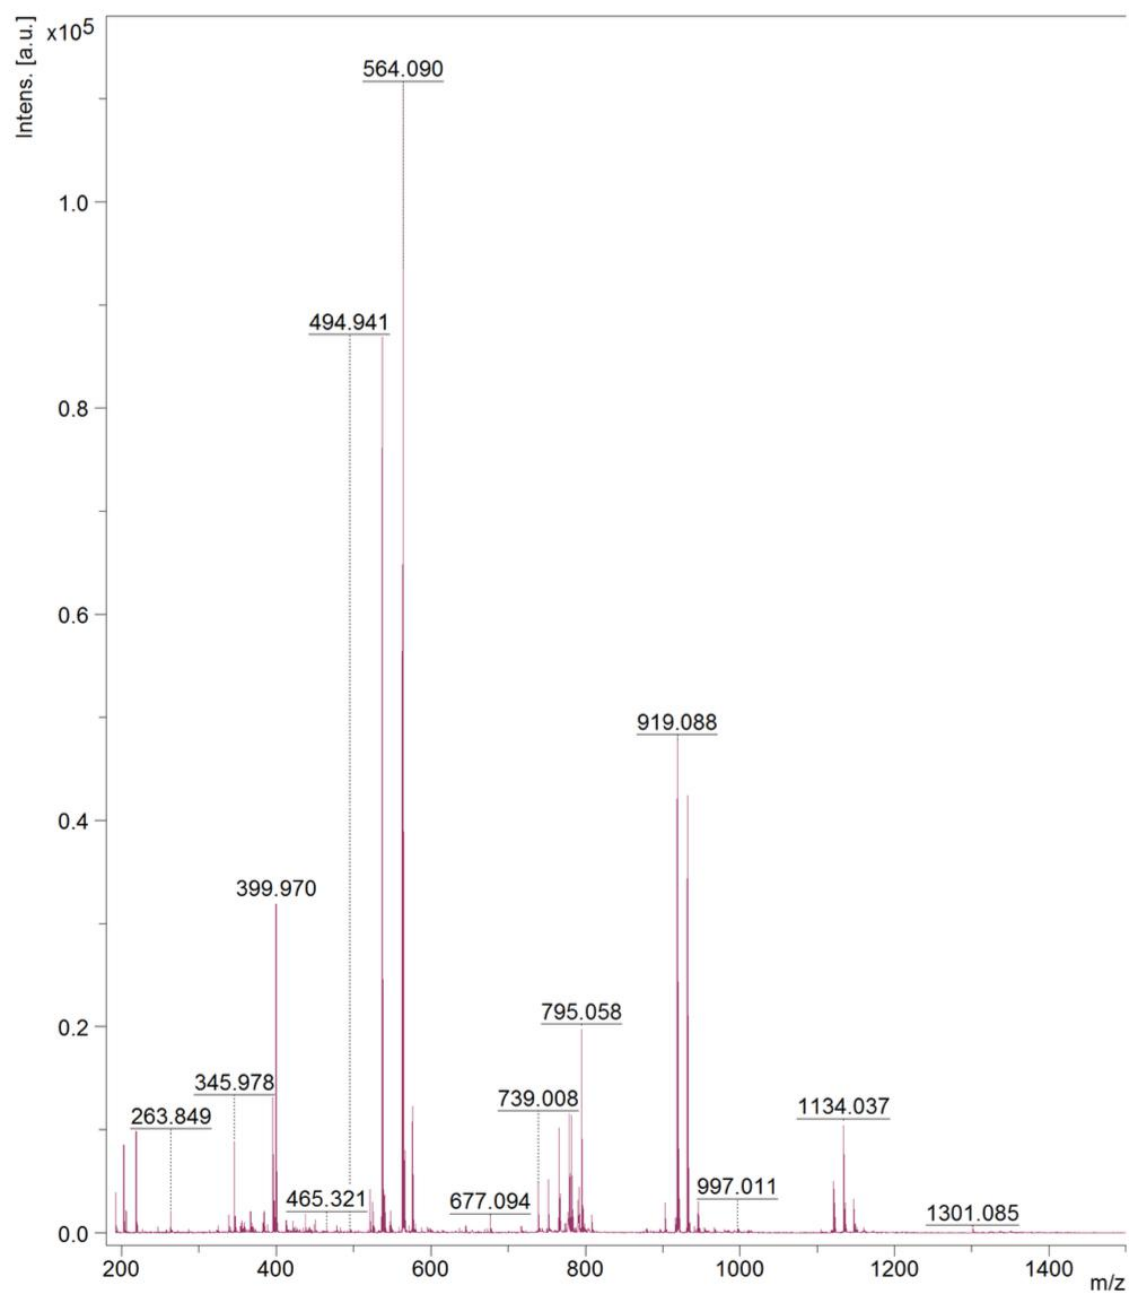

**Figure S8.** MALDI-TOF-MS spectrum of  $[\text{VO}(\text{dipic})(\text{phen})] \cdot 3 \text{H}_2\text{O}$  (DHB matrix).



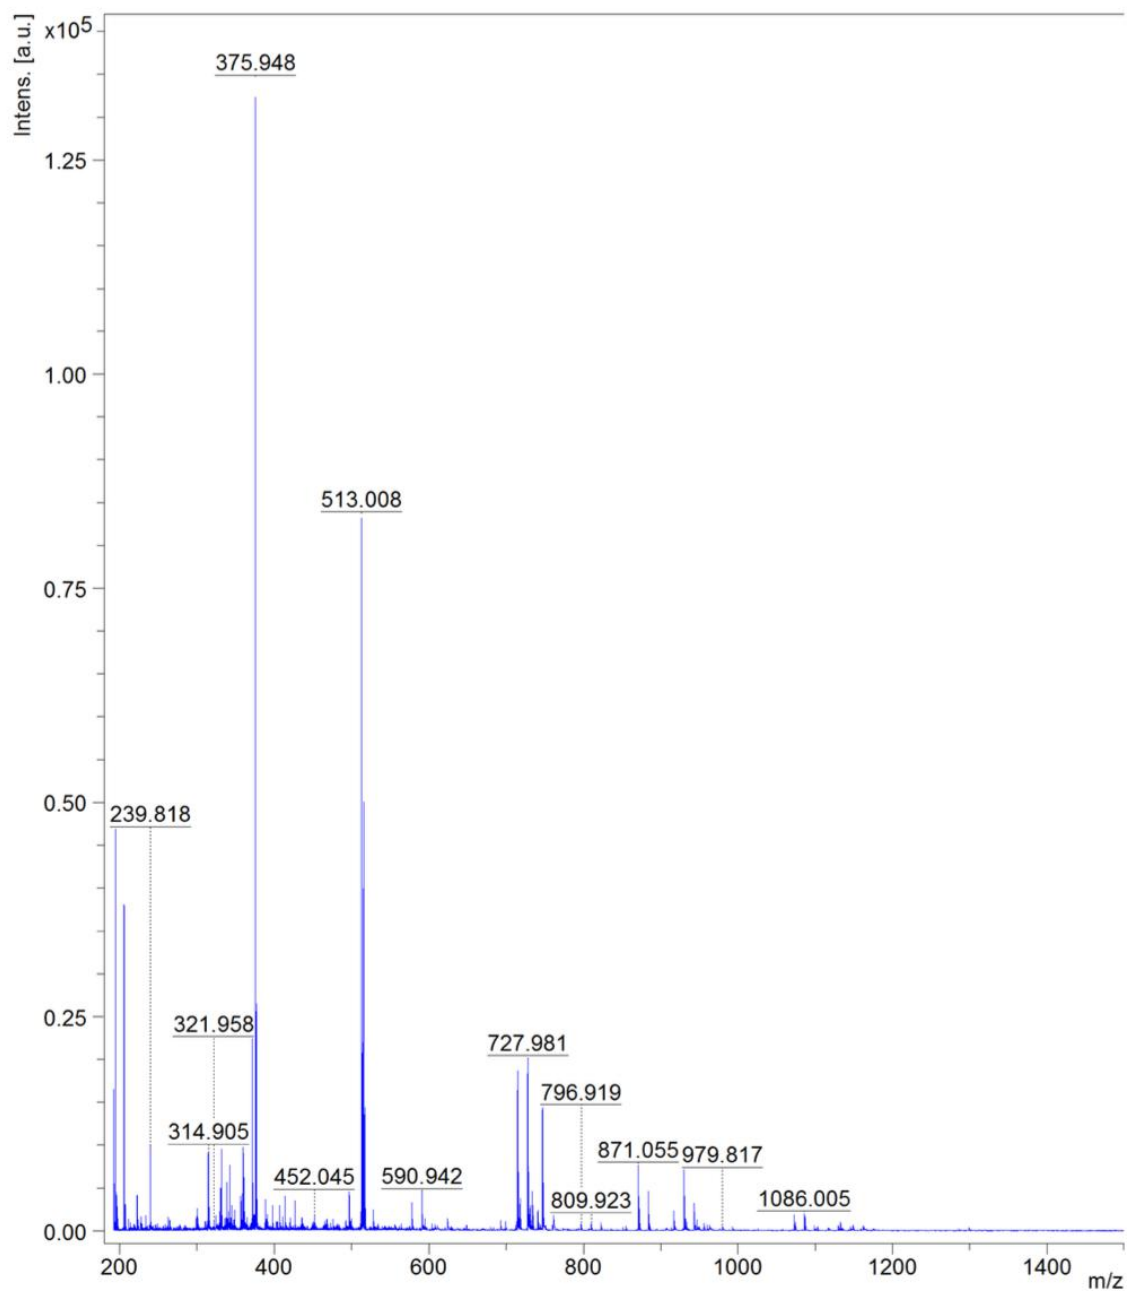

**Figure S9.** MALDI-TOF-MS spectrum of  $[\text{VO}(\text{dipic})(\text{bipy})] \cdot \text{H}_2\text{O}$  (DHB matrix).

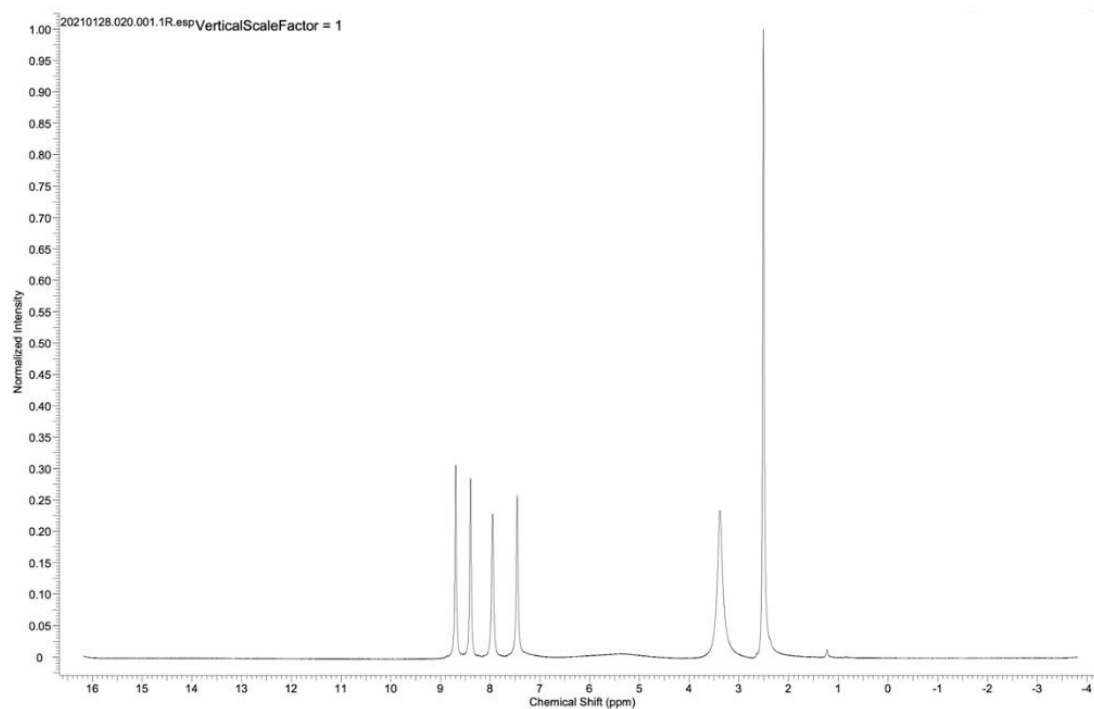

**Figure S10.**  $^1\text{H}$  NMR spectrum of  $[\text{VO}(\text{dipic})(\text{bipy})] \cdot \text{H}_2\text{O}$ .

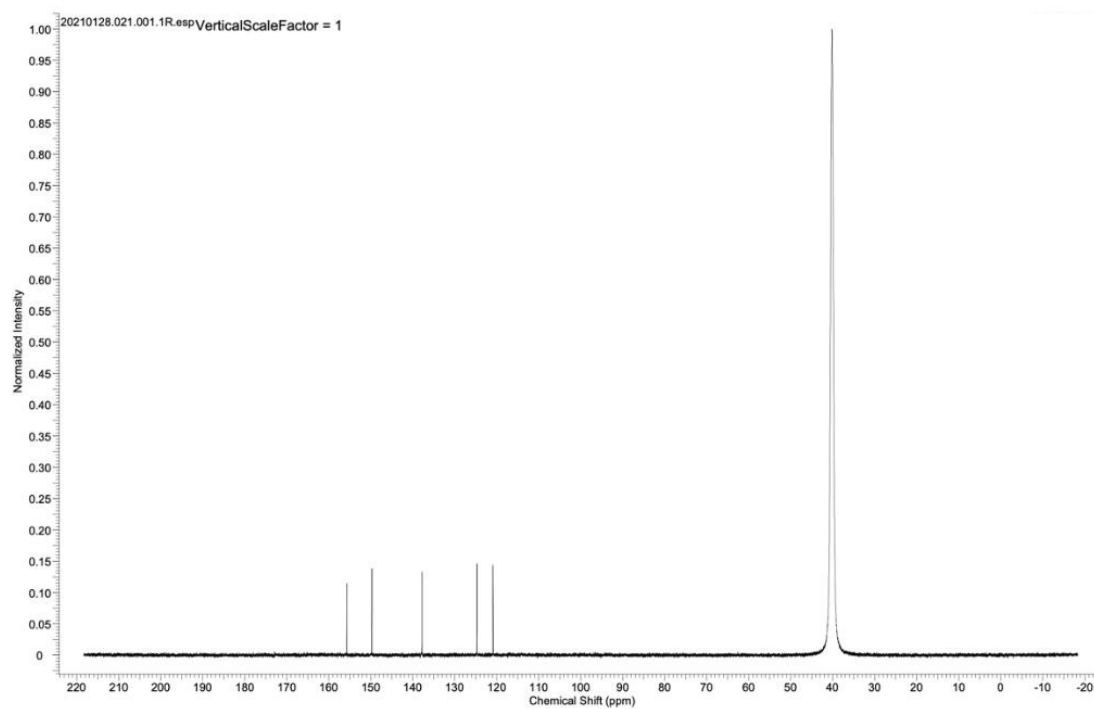

**Figure S11.**  $^{13}\text{C}$  NMR spectrum of  $[\text{VO}(\text{dipic})(\text{bipy})] \cdot \text{H}_2\text{O}$ .
